# Supplementary material
Source: PubMed Central journal article supplement (PMC3964035)
Supplement: 1313618111_pnas.201313618SI.pdf [file 1313618111_pnas.201313618SI.pdf]

# Supporting Information

Sebti et al. 10.1073/pnas.1313618111

## SI Materials and Methods

**Autophagy Measurement. Staining of Endogenous LC3.** First, 12- $\mu$ m-thick liver and lung sections of paraffin-embedded WT and *Bat3*<sup>-/-</sup> E18.5 mouse embryos were deparaffinized, and then subjected to heat-induced epitope retrieval in citrate buffer pH 6.0 at subboiling temperature for 30 min. Endogenous biotin activity was blocked using an avidin/biotin complex system (Vector Laboratories) according to the manufacturer's instructions. Sections were processed using the M.O.M. Basic Immunodetection Kit (Vector Laboratories) and then hybridized at 4 °C with an anti-mouse LC3B primary antibody at a final concentration of 2.5  $\mu$ g/mL (clone 5F10; Nanotools) overnight. Sections were then incubated with FITC-streptavidin (1:100; (Vector Laboratories) for 30 min. After three washes in phosphate buffer saline (PBS), slides were mounted with Vectashield mounting medium (Vector Laboratories) and analyzed with a Leica DMIRE2 microscope equipped with an oil immersion  $\times 63/1.4$  apochromatic objective and a 12-bit Coolsnap FX CCD camera (Princeton Instruments), both controlled by the MetaMorph imaging software (Universal Imaging).

**Electron Microscopy.** Cells were immersed in a solution of 2.5% glutaraldehyde in Sorensen's buffer (0.1 M, pH 7.4) overnight at 4 °C. After a rinse in Sorensen's buffer, cells were postfixed in a 0.5% osmic acid for 2 h in the dark at room temperature. After two rinses in Sorensen's buffer, the cells were dehydrated in a graded series of ethanol solutions (30–100%). The cells were embedded in EmBed 812 using a Leica EM AMW automated microwave tissue processor for electron microscopy. Thin sections (70 nm, obtained with a Leica-Reichert Ultracut E microtome) were collected at different levels of each block. These sections were counterstained with uranyl acetate and observed with a Hitachi 7100 transmission electron microscope at the Centre de Ressources en Imagerie Cellulaire de Montpellier, Montpellier, France.

**GFP-LC3 Assay.** When required, cotransfections (peGFP-LC3 to plasmid ratio of 1:3) were performed with Lipofectamine 2000 (Life Technologies). Autophagy was measured by counting the number of GFP-LC3 dots per cell (at least 50–100 cells per condition) using an Axioplan microscope (Carl Zeiss). When required, chloroquine (Sigma-Aldrich) was used at 20  $\mu$ M for 6 h.

**Measurement of Long-Lived Protein Degradation.** Cells were incubated for 18 h at 37 °C with 0.2 Ci/mL L-[<sup>14</sup>C]valine. After three rinses with PBS, cells were incubated for 2 h with complete medium (CM) or Earle's balanced salt solution (EBSS) plus 0.1% BSA and 10 mM cold valine, followed by precipitation in 10% (vol/vol) trichloroacetic acid at 4 °C. The precipitated proteins were separated from soluble radioactivity by centrifugation at 600  $\times$  g for 10 min. The rate of protein degradation was calculated as acid-soluble radioactivity recovered from both cells and medium.

**Staining of Endogenous p300.** Cells on coverslips were fixed in 2% paraformaldehyde for 10 min, permeabilized with 0.4% Triton X-100 for 5 min, and then incubated at 37 °C with a primary anti-p300 antibody (N15; 1:200) for 30 min and with a secondary Alexa Fluor 488 goat anti-rabbit antibody (Life Technologies) for 20 min. Slides were observed under an Axioplan II imaging fluorescence microscope with a 63 $\times$  oil immersion objective and an AxioCam MRm microscope, both controlled by AxioVision software (all from Carl Zeiss). Fluorescence intensity in the cytosol was quantified with Image J.

**Western Blot Analysis.** The following antibodies were used for Western blot analyses: anti-BAT3 (1:2,000) (1), anti-ATG12 (1:1,000)

(Novus Biologicals); anti-LC3 (1:5,000), anti-ATG7 (1:1,000) (Sigma-Aldrich); anti-p53 (1C12, 1:1,000; Cell Signaling Technology); anti-ERK2 (1:2,000), anti-p300 (N15, 1:1,000), anti-ATG5 (1:1,000) (Santa Cruz Biotechnology); anti-acetyl-p53 Lys373 (1:1,000), anti-acetyl-p53 Lys320 (1:1,000) (Upstate Biotechnology); anti-TBP (1:1,000), anti-LAMP2 (1:1,000) (Abcam); and anti-GAPDH (1:1,000) (Thermo Scientific). The appropriate secondary HRP-linked species-specific whole secondary antibodies were used next, and bound antibodies were detected using ECL Plus Western blotting detection reagents (GE Healthcare).

**Immunoprecipitation.** For detection of acetylated ATG proteins, 2 mg of cell lysates was immunoprecipitated with a rabbit anti-acetylated lysine antibody (1:100) in lysis buffer supplemented with deacetylase inhibitors 50 mM trichostatin A and 500 mM nicotinamide (Sigma-Aldrich). This was followed by Western blot analysis using anti-ATG7, anti-ATG5, anti-ATG12, or anti-LC3 antibodies.

**Immunoprecipitation.** For immunoprecipitation of endogenous p300, cells were lysed in complete lysis buffer (50 mM Hepes pH 7.5, 150 mM NaCl, 1.5 mM MgCl<sub>2</sub>, 100 mM NaF, 10 mM NaPPI, 1 mM EDTA, 10% glycerol, 1% Triton X-100, and protease inhibitors; Roche Applied Science) at 4 °C for 1 h, followed by overnight immunoprecipitation at 4 °C with a rabbit polyclonal anti-p300 antibody (N15; 1:1,000). Protein A Sepharose beads (GE Healthcare) were added at 4 °C for 2 h, followed by three washes with washing buffer (50 mM Hepes pH 7.5, 150 mM NaCl, 1 mM EDTA, 10% glycerol, and 1% Triton X-100). Immunoprecipitates were separated by SDS/PAGE, and BAT3 or ATG7 was detected by immunoblotting.

**Quantitative Real-Time PCR.** Real-time PCR was performed in triplicate with SYBR Green Master Mix and the Light Cycler 480 System (Roche Applied Science), with the following cycling parameters: 95 °C for 10 min; 40 cycles of 95 °C for 15 s, 60 °C for 10 s, and 72 °C for 15 s; and then a melting curve protocol. The primers used to amplify *Bat3*, *p53*, *Dram1*, *Sestrin1*, *Sestrin2*, *Tigar*, *Puma*, and *p21* were 5'-TGCTGACAGAGGCAGCTATG-3' and 5'-AGCCTGGAGGTACTGGTGAA-3'; 5'-GCAACTATGGCTTCCACCTG-3' and 5'-CAGAGCACCAGCCGACCGACG-3'; 5'-ATGCCTAAACTGCAGCGAT-3' and 5'-ACACTCCACCATGTTGACCC-3'; 5'-GTGGACCCAGAACGAGATGACGTGGC-3' and 5'-GACACTGTGGAAGGCAGCTATGTGC-3'; 5'-TCCGAGTGCCATTCCGAGAT-3' and 5'-TCCGGGTGTAGACCCATCAC-3'; 5'-GAAACCAGTCTCCGAAAGG-3' and 5'-CTTGACCGTTATCCGCCAT-3'; 5'-TGTCGATGCTGCTCTTCTTG-3' and 5'-GTGTGGAGGAGGAGGAGTGG-3'; and 5'-ATCACCAGGATTGGACATGG-3' and 5'-CGGTGTCAGAGTCTAGGGGA-3', respectively. mRNA expression levels were normalized versus the expression level of the two housekeeping genes *Mrs9* and *18S*.

**Retroviral Infection.** Retroviral particles were produced in 293T cells by transfection of gag/pol and env VSV-G and viral vector pSIREN shLuc or pSIREN shp300 or pQCXIH CMV/TO DEST BAT3FL or pQCXIH CMV/TO DEST BAT3 $\Delta$ NLS using JET-PEI (Polyplus Transfection). At 48 h after transfection, cell supernatants containing viral particles were harvested and then added overnight to the culture medium of mouse embryonic fibroblasts (MEFs) with 8  $\mu$ g/mL polybrene (Sigma-Aldrich).

BAT3 FL and BAT3 $\Delta$ NLS sequences from PCI-HA BAT3 FL and PCI-HA BAT3 $\Delta$ NLS were subcloned into pQCXIH CMV/TO DEST using Gateway Cloning Technology (Life Technologies).

*BAT3*<sup>-/-</sup> MEFs stably expressing *BAT3* FL and *BAT3*ΔNLS were selected using 100 μg/mL hygromycin B (Sigma-Aldrich). ShRNA directed against mouse p300 mRNA (CCATGTTG-CATTCAACTATAA) or firefly luciferase mRNA as a control

were cloned into the retroviral vector RNAi Ready pSIREN (Clontech) following the manufacturer's instructions. shRNA-expressing cells were selected with 2 μg/mL of puromycin (Sigma-Aldrich) at 48 h after infection.

- Desmots F, Russell HR, Lee Y, Boyd K, McKinnon PJ (2005) The reaper-binding protein scythe modulates apoptosis and proliferation during mammalian development. *Mol Cell Biol* 25(23):10329–10337.

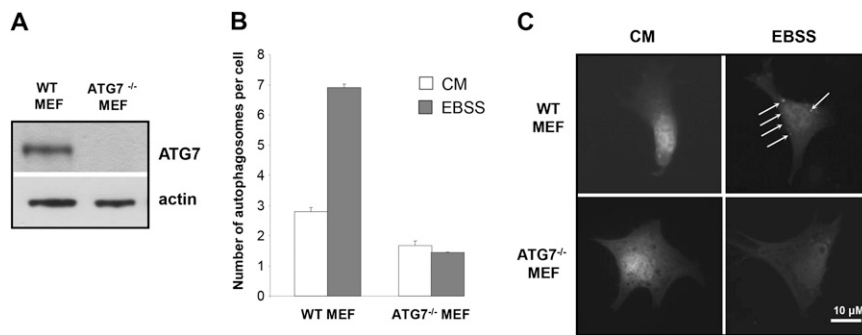

**Fig. 51.** (A) Western blot analysis of ATG7 expression. (B) Quantification of autophagosomes per cell in WT and WT and ATG7<sup>-/-</sup> MEF clones transfected with GFP-LC3. (C) Representative images of GFP-LC3 staining. Results are mean (SD) of the number of autophagosomes per cell from three experiments. Arrows indicate GFP-LC3 dots (i.e., autophagosomal structures).

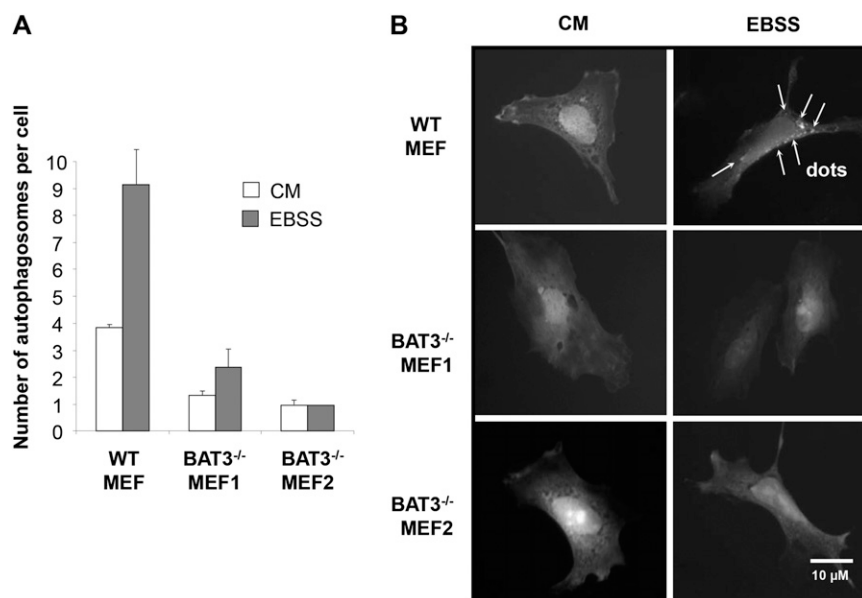

**Fig. 52.** (A) Quantification of autophagosomes per cell in WT and two different *BAT3*<sup>-/-</sup> MEF clones transfected with GFP-LC3. (B) Representative images of GFP-LC3 staining. Results are mean (SD) of the number of autophagosomes per cell from three experiments. Arrows indicate GFP-LC3 dots (i.e., autophagosomal structures).

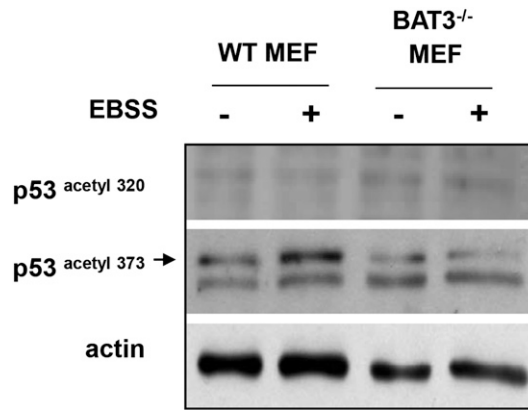

**Fig. S3.** Western blot analysis of p53 acetylation at lysine 373 and lysine 320 in WT and *BAT3*<sup>-/-</sup> MEFs in CM (-) or EBSS (+) for 30 min. Cell extracts were immunoblotted using anti-p53 acetylated at lysine 373, anti-p53 acetylated at lysine 320, and anti-actin antibodies.

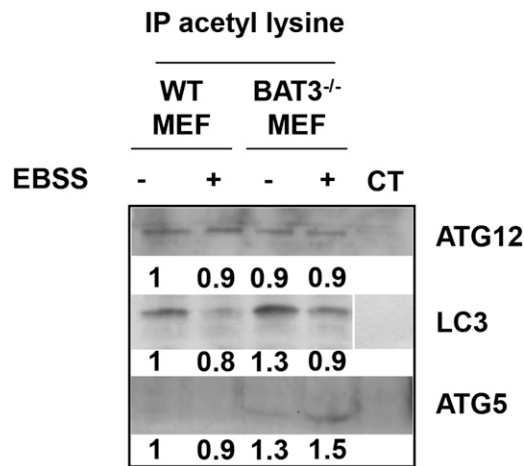

**Fig. S4.** Western blot analysis of ATG12, LC3, and ATG5 acetylation after immunoprecipitation (IP) of 2 mg of protein lysates using an antibody that recognizes the acetyl-lysine residues in WT and *BAT3*<sup>-/-</sup> MEFs. Cells were grown in CM (-) or EBSS (+) for 2 h before immunoprecipitation. The densitometric intensity was measured for each condition and compared with that of WT MEFs in CM.

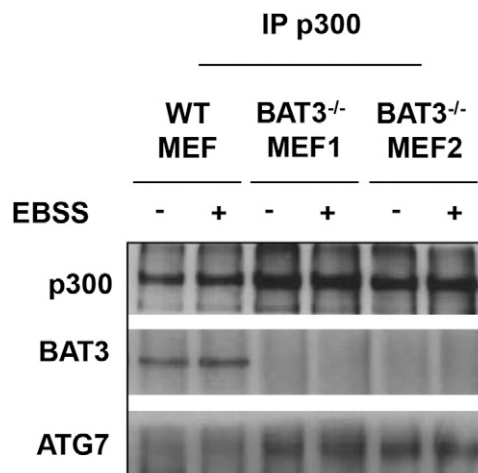

**Fig. S5.** Coimmunoprecipitation (IP) of ATG7 with an anti-p300 antibody in WT and two different *BAT3*<sup>-/-</sup> MEF clones in CM (-) or switched to EBSS (+) for 2 h. The control is the same as in Fig. 4A.

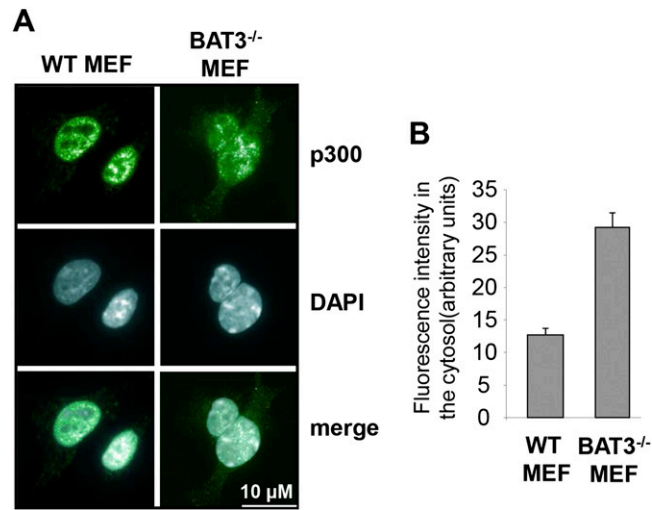

**Fig. S6.** (A) Representative light microscopy images of endogenous p300 in WT and *BAT3*<sup>-/-</sup> MEFs. Nuclei were visualized with DAPI stain. (B) Quantification of the fluorescence intensity of p300 in the cytosol of WT and *BAT3*<sup>-/-</sup> MEFs. Results are mean (SD) cytosol fluorescence intensity (in arbitrary units) of 100 cells in five independent experiments.
